# Supplementary material for: Hydrogeochemical controls on brook trout spawning habitats in a coastal stream
Source: Copernicus journal article supplement (doi:10.5194/hess-22-6383-2018), 2018-12-10
Supplement: Supplementary file 1 [file hess-22-6383-2018-supplement.zip]

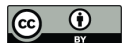

*Supplement of*

## **Hydrogeochemical controls on brook trout spawning habitats in a coastal stream**

**M. A. Briggs et al.**

*Correspondence to:* Martin A. Briggs ([mbriggs@usgs.gov](mailto:mbriggs@usgs.gov))

- [hess-22-6383-2018-supplement-title-page.pdf](#)
- [underwater\\_trout\\_spawning.MP4](#)

The copyright of individual parts of the supplement might differ from the CC BY 4.0 License.
